# Supplementary material for: Accuracy of algorithms to identify patients with a diagnosis of major cancers and cancer-related adverse events in an administrative database: a validation study in an acute care hospital in Japan
Source: HighWire-hosted journal article supplement (doi:10.1136/bmjopen-2021-055459), 2022-07-01
Supplement: bmjopen-2021-055459supp007_data_supplement.pdf [file bmjopen-2021-055459supp007_data_supplement.pdf]

## Supplemental Tables

**Table S1.** Inclusion criteria for lung, breast, colorectal, ovarian, bladder, and prostate cancer

| Conventional classification                    | WHO classification                  | Patient criteria                                                                                        |
|------------------------------------------------|-------------------------------------|---------------------------------------------------------------------------------------------------------|
| <b>True primary lung cancer in this study*</b> |                                     |                                                                                                         |
| Lung tumor                                     | Tumors of the lung                  |                                                                                                         |
| Epithelial tumor                               | Epithelial tumors                   |                                                                                                         |
| Adenocarcinoma                                 | Adenocarcinoma                      | Inclusion as non-small cell carcinoma (excluding atypical adenomatoid familial of pre-invasive lesions) |
| Squamous cell carcinoma                        | Squamous cell carcinoma             | Inclusion as non-small cell carcinoma (excluding atypia of pre-invasive lesions)                        |
| Neuroendocrine tumors                          | Neuroendocrine tumors               |                                                                                                         |
| Small cell carcinoma                           | Small cell carcinoma                | Inclusion as small cell cancer                                                                          |
| Large cell neuroendocarcinoma                  | Large cell neuroendocrine carcinoma | Exclusion                                                                                               |
| Carcinoid tumor                                | Carcinoid tumors                    | Exclusion                                                                                               |
| Pre-invasive lesion                            | Preinvasive lesion                  | Exclusion                                                                                               |
| Large cell carcinoma                           | Large cell carcinoma                | Inclusion as non-small cell carcinoma                                                                   |
| Adenosquamous carcinoma                        | Adenosquamous carcinoma             | Inclusion as non-small cell carcinoma                                                                   |
| Sarcomatoid carcinoma                          | Sarcomatoid carcinoma               | Inclusion as non-small cell carcinoma                                                                   |
| Unclassified carcinoma                         | Other and unclassified carcinoma    | Exclusion                                                                                               |
| Salivary gland type tumor                      | Salivary gland-type tumors          | Exclusion                                                                                               |
| Papilloma                                      | Papillomas                          | Exclusion                                                                                               |
| Adenoma                                        | Adenomas                            | Exclusion                                                                                               |
| Mesenchymal tumor                              | Mesenchymal tumors                  | Exclusion                                                                                               |
| Lymphohistiocytic tumor                        | Lymphohistiocytic tumors            | Exclusion                                                                                               |
| Tumors of ectopic origin                       | Tumors of ectopic origin            | Exclusion                                                                                               |

|                                                                 |                                               |           |
|-----------------------------------------------------------------|-----------------------------------------------|-----------|
| Lung metastases                                                 | Metastases to the lung                        | Exclusion |
| Pleural tumor                                                   | Tumor of the pleura                           |           |
| Mesothelial tumor                                               | Mesothelial tumors                            | Exclusion |
| Lymphoproliferative disorders                                   | Lymphoproliferative disorders                 | Exclusion |
| Mesenchymal tumor                                               | Mesenchymal tumors                            | Exclusion |
| <b>True primary breast cancer in this study<sup>#</sup></b>     |                                               |           |
| Mammary gland tumor                                             |                                               |           |
| Epithelial tumor                                                | Epithelial tumors                             |           |
| Benign tumor                                                    | Benign tumors                                 | Exclusion |
| Malignant tumor                                                 | Malignant tumors (carcinomas)                 |           |
| Noninfiltrating carcinoma                                       | Noninvasive carcinoma                         | Exclusion |
| Microinvasive carcinoma                                         | Microinvasive carcinoma                       | Inclusion |
| Invasive carcinoma                                              | Invasive breast carcinoma                     | Inclusion |
| Paget's disease                                                 | Paget's disease of the nipple                 | Exclusion |
| Mixed connective and epithelial tumors                          | Mixed connective tissue and epithelial tumors | Exclusion |
| Nonepithelial tumor                                             | Nonepithelial tumors                          | Exclusion |
| Other                                                           | Others                                        | Exclusion |
| So-called mammary gland disease                                 | So-called mastopathy                          | Exclusion |
| Hamartoma                                                       | Hamartoma                                     | Exclusion |
| Inflammatory lesions                                            | Inflammatory lesion                           | Exclusion |
| Mammary fibrosis                                                | Fibrous disease                               | Exclusion |
| Gynecomastia                                                    | Gynecomastia                                  | Exclusion |
| Accessory milk                                                  | Accessory mammary gland                       | Exclusion |
| Metastatic tumors                                               | Metastatic tumor                              | Exclusion |
| Other                                                           | Others                                        | Exclusion |
| <b>True primary colorectal cancer in this study<sup>†</sup></b> |                                               |           |
| Benign epithelial tumor                                         |                                               | Exclusion |
| Malignant epithelial tumor                                      |                                               |           |
| Adenocarcinoma (adenocarcinoma)                                 |                                               | Inclusion |

|                                                                                 |                   |           |
|---------------------------------------------------------------------------------|-------------------|-----------|
| Adenosquamous carcinoma (adenosquamous carcinoma)                               |                   | Inclusion |
| Squamous cell carcinoma (squamous carcinoma)                                    |                   | Inclusion |
| Carcinoid tumour (carcinoid tumor)                                              |                   | Exclusion |
| Endocrine carcinoma (endocrine cell carcinoma)                                  |                   | Exclusion |
| Miscellaneous (miscellaneous histological types of malignant epithelial tumors) |                   | Exclusion |
| Nonepithelial tumor                                                             |                   | Exclusion |
| Lymphoma (lymphoma)                                                             |                   | Exclusion |
| Unclassifiable tumor                                                            |                   | Exclusion |
| Metastatic tumors                                                               |                   | Exclusion |
| Tumor-like lesions                                                              |                   | Exclusion |
| Hereditary neoplasms and gastrointestinal polyposis                             |                   | Exclusion |
| Appendix                                                                        |                   | Exclusion |
| Anal canal (including perianal skin)                                            |                   | Exclusion |
| <b>True primary ovarian cancer in this study<sup>‡</sup></b>                    |                   |           |
| Ovarian tumor                                                                   | Ovarian tumors    |           |
| Epithelial tumor                                                                | Epithelial tumors |           |
| Serous tumor                                                                    | Serous tumors     |           |
| Benign                                                                          | Benign            | Exclusion |
| Borderline malignancy                                                           | Borderline        | Exclusion |
| Malignant                                                                       | Malignant         | Inclusion |
| Mucinous neoplasms                                                              | Mucinous tumors   |           |
| Benign                                                                          | Benign            | Exclusion |
| Borderline malignancy                                                           | Borderline        | Exclusion |
| Malignant                                                                       | Malignant         | Inclusion |

|                                                                       |                                                                       |           |
|-----------------------------------------------------------------------|-----------------------------------------------------------------------|-----------|
| Endometrioid tumor                                                    | Endometrioid tumors                                                   |           |
| Benign                                                                | Benign                                                                | Exclusion |
| Borderline malignancy                                                 | Borderline                                                            | Exclusion |
| Malignant                                                             | Malignant                                                             | Inclusion |
| Clear cell tumors                                                     | Clear cell tumors                                                     |           |
| Benign                                                                | Benign                                                                | Exclusion |
| Borderline malignancy                                                 | Borderline                                                            | Exclusion |
| Malignant                                                             | Malignant                                                             | Inclusion |
| Brenner's tumor                                                       | Brenner tumors                                                        |           |
| Benign                                                                | Benign                                                                | Exclusion |
| Borderline malignancy                                                 | Borderline                                                            | Exclusion |
| Malignant                                                             | Malignant                                                             | Inclusion |
| Seromucosal tumor                                                     | Seromucinous tumors                                                   |           |
| Benign                                                                | Benign                                                                | Exclusion |
| Borderline malignancy                                                 | Borderline                                                            | Exclusion |
| Malignant                                                             | Malignant                                                             | Inclusion |
| Anaplastic Carcinoma                                                  | Undifferentiated carcinoma                                            | Inclusion |
| Mesenchymal tumor                                                     | Mesenchymal tumors                                                    | Exclusion |
| Mixed epithelial mesenchymal tumor                                    | Mixed epithelial and Mesenchymal tumors                               | Exclusion |
| Sex cord–stromal tumor                                                | Sex cord–stromal tumors                                               | Exclusion |
| Mixed sex cord–stromal tumor                                          | Mixed sex cord–stromal tumors                                         | Exclusion |
| Germ cell tumor                                                       | Germ cell tumors                                                      | Exclusion |
| Somatic tumors associated with monodermal teratomas and dermoid cysts | Monodermal teratoma and somatic-type tumors arising from dermoid cyst | Exclusion |
| Germ cell and policy stromal tumors                                   | Germ cell–sex cord–stromal tumors                                     | Exclusion |
| Other tumors                                                          | Miscellaneous tumors                                                  | Exclusion |
| Mesothelial tumor                                                     | Mesothelial tumors                                                    | Exclusion |

|                                                               |                              |            |
|---------------------------------------------------------------|------------------------------|------------|
| Soft tissue                                                   | Soft tissue tumors           | Exclusion  |
| Neoplastic lesions                                            | Tumor-like lesions           | Exclusion  |
| Lymphoid and myeloid neoplasms                                | Lymphoid and myeloid tumors  | Exclusion  |
| Secondary tumors                                              | Secondary tumors             | Exclusion  |
| Tubal tumor                                                   | Tubal tumors                 | Inclusion  |
| Peritoneal tumor                                              | Peritoneal tumors            | Inclusion  |
| Epithelial tumor                                              | Epithelial tumors            | Inclusion* |
| Mesothelial tumor                                             | Mesothelial tumors           | Exclusion  |
| Smooth muscle tumors                                          | Smooth muscle tumors         | Exclusion  |
| Tumors of unknown origin                                      | Tumors of uncertain origin   | Exclusion  |
| Other primary tumors                                          | Miscellaneous primary tumors | Exclusion  |
| Secondary tumors                                              | Secondary tumors             | Exclusion  |
| <b>True primary prostate cancer in this study<sup>£</sup></b> |                              |            |
| Malignant tumor                                               |                              |            |
| Adenocarcinoma                                                | Adenocarcinoma               | Inclusion  |
| Rare adenocarcinoma                                           | Adenocarcinoma rare type     | Inclusion  |
| Urothelial carcinoma                                          | Urothelial carcinoma         | Inclusion  |
| Squamous cell carcinoma                                       | Squamous carcinoma           | Inclusion  |
| Adenosquamous carcinoma                                       | Adenosquamous carcinoma      | Inclusion  |
| Basal cell carcinoma                                          | Basal cell carcinoma         | Inclusion  |
| Small cell carcinoma                                          | Small cell carcinoma         | Inclusion  |
| Anaplastic carcinoma                                          | Undifferentiated carcinoma   | Inclusion  |
| Other malignant tumors                                        | Other malignant tumors       |            |
| Sarcoma                                                       | Sarcoma                      | Exclusion  |
| Metastatic tumors                                             | Metastatic tumor             | Exclusion  |
| Tumor unclassifiable                                          | Unclassified tumor           | Exclusion  |
| Borderline and associated lesions                             |                              | Exclusion  |

| <b>True primary prostate cancer in this study</b>                                   |                            |           |
|-------------------------------------------------------------------------------------|----------------------------|-----------|
| Malignant tumor                                                                     |                            |           |
| Adenocarcinoma                                                                      | Adenocarcinoma             | Inclusion |
| Rare adenocarcinoma                                                                 | Adenocarcinoma rare type   | Inclusion |
| Urothelial carcinoma                                                                | Urothelial carcinoma       | Inclusion |
| Squamous cell carcinoma                                                             | Squamous carcinoma         | Inclusion |
| Adenosquamous carcinoma                                                             | Adenosquamous carcinoma    | Inclusion |
| Basal cell carcinoma                                                                | Basal cell carcinoma       | Inclusion |
| Small cell carcinoma                                                                | Small cell carcinoma       | Inclusion |
| Anaplastic carcinoma                                                                | Undifferentiated carcinoma | Inclusion |
| Other malignant tumors                                                              | Other malignant tumors     |           |
| Sarcoma                                                                             | Sarcoma                    | Exclusion |
| Metastatic tumors                                                                   | Metastatic tumor           | Exclusion |
| Tumor unclassifiable                                                                | Unclassified tumor         | Exclusion |
| Borderline and associated lesions                                                   |                            | Exclusion |
| <b>True primary bladder cancer in this study</b>                                    |                            |           |
| Bladder cancer                                                                      |                            |           |
| Urothelial tumors                                                                   |                            |           |
| Noninvasive flat urothelial carcinoma in situ (urothelial carcinoma in situ)        |                            | Exclusion |
| Papillary urothelial carcinoma in situ (noninvasive papillary urothelial carcinoma) |                            | Exclusion |
| Invasive urothelial carcinoma (invasive urothelial carcinoma)                       |                            | Inclusion |
| Squamous cell neoplasia                                                             |                            | Inclusion |
| Glandular tumors                                                                    |                            | Inclusion |
| Tumors related to the ureteral membrane                                             |                            | Inclusion |
| Neuroendocrine tumors                                                               |                            | Exclusion |

|                            |  |           |
|----------------------------|--|-----------|
| Anaplastic carcinoma       |  | Exclusion |
| Pigmented tumor            |  | Exclusion |
| Mesenchymal tumor          |  | Exclusion |
| Lymphohematopoietic tumors |  | Exclusion |

\*For true primary lung cancer, based on the classification tables (p70-73) of the 8th edition of the Clinical/Pathological Handling Code of the Japanese Lung Cancer Society (original publication 2016).

#For true primary breast cancer, based on the histological classification table (p24-25) of the 18th Edition of the Clinical and Pathological Handling Code of the Japanese Breast Cancer Society " (Gold Original Publication 2018) and the comparison table (P65-67) between the WHO classification and the handling conventional classification of the year of publication.

†For true primary colorectal cancers, based on the classification tables (p30-31) of the 9th edition of the Clinical/Pathological Handling Code (original publication 2018) of the Colon Cancer Study Group

‡For true primary ovarian cancers, based on the classification tables (p22-27) of the first edition of the Clinical and Pathological Handling Code (original publication 2016) of the Japanese Society of Obstetrics and Gynecology/Japanese Society of Pathology

‡For true primary prostate cancer, based on the classification table (p.61) of the Japanese Society of Urological Sciences/Japan Society of Pathology/Japan Society of Medical Radiology, 4th edition of the Covenant on Clinical and Pathological Handling (Kanehara Publishing, 2010).

**Table S2.** Outcome definitions

| Outcome                              | Definition |                                                                                                                                                                                                                                                                                                                                                                                          |
|--------------------------------------|------------|------------------------------------------------------------------------------------------------------------------------------------------------------------------------------------------------------------------------------------------------------------------------------------------------------------------------------------------------------------------------------------------|
| <b>A. Primary lung cancer</b>        | A1         | <ul style="list-style-type: none"> <li>Definitive diagnosis of lung cancer (ICD-10: C340, C341, C342, C343, or C349) recorded between 2014 and 2018 in DPC data. Primary diagnosis, admission-precipitating diagnosis, or most resource-consuming diagnosis.</li> </ul>                                                                                                                  |
|                                      | A2         | <ul style="list-style-type: none"> <li>Definitive diagnosis of lung cancer (ICD-10: C340, C341, C342, C343, or C349) recorded between 2014 and 2018 in EMR data.</li> </ul>                                                                                                                                                                                                              |
|                                      | A3         | <ul style="list-style-type: none"> <li>Diagnosis of lung cancer (Japanese original diagnostic code: 1629003) recorded between 2014 and 2018 in EMR data.</li> </ul>                                                                                                                                                                                                                      |
|                                      | A4         | <ul style="list-style-type: none"> <li>Definitions written in A1 and specimen examination for laboratory diagnosis (Japanese original procedural code: 160060170, 160060270, 160171470, 160185110, 160214310, 160209750, 160214710, 160214810, 160190270, 160190370, 160190470, 160190570, 160214470, 160214970, or 160062310) recorded between 2014 and 2018 in claims data.</li> </ul> |
| <b>B. Non-small cell lung cancer</b> | B1         | <ul style="list-style-type: none"> <li>Diagnosis of non-small cell lung cancer (Japanese original diagnostic code: 8847272, 8847732, 8849238, 8847598, 8847637, 8847664, or 8842053) recorded between 2014 and 2018 in EMR data.</li> </ul>                                                                                                                                              |
|                                      | B2         | <ul style="list-style-type: none"> <li>Diagnosis of non-small cell lung cancer (Japanese original diagnostic code: 8842835, 8847676, 8847677, 8847678, 8847679, 8835493, 8847634, 8847635, 8847636, 8847637, 8837666, 8847661, 8847662,</li> </ul>                                                                                                                                       |

| Outcome                                              | Definition |                                                                                                                                                                                                                                                                                                 |
|------------------------------------------------------|------------|-------------------------------------------------------------------------------------------------------------------------------------------------------------------------------------------------------------------------------------------------------------------------------------------------|
|                                                      |            | 8847663, 8847664, 8831458, 8847595, 8847596, 8847597, 8847598, 8833932, 1629003, 1629006, 1629009, 8838805, 8838844, 8838852, 8838898, 8838901, 8842053, 8842831, 8842832, 8842833, 8842834, 8847272, 8847732, 8849238, 8849788, or 2312002) recorded between 2014 and 2018 in EMR data.        |
| <b>C. Small cell lung cancer</b>                     | C1         | <ul style="list-style-type: none"> <li>Diagnosis of small cell lung cancer (Japanese original diagnostic code: 8847594, 8842185, 8847633, 8847660, or 8847675) recorded between 2014 and 2018 in EMR data.</li> </ul>                                                                           |
| <b><math>\alpha</math>. Primary breast cancer</b>    | $\alpha$ 1 | <ul style="list-style-type: none"> <li>Definitive diagnosis of breast cancer (ICD-10: C500, 501, 502, 503, 504, 505, 506, 508, 509, or D059) recorded between 2014 and 2018 in DPC data. Primary diagnosis, admission-precipitating diagnosis, or most resource-consuming diagnosis.</li> </ul> |
|                                                      | $\alpha$ 2 | <ul style="list-style-type: none"> <li>Definitive diagnosis of breast cancer (ICD-10: C500, 501, 502, 503, 504, 505, 506, 508, 509, or D059) recorded between 2014 and 2018 in EMR data.</li> </ul>                                                                                             |
|                                                      | $\alpha$ 3 | <ul style="list-style-type: none"> <li>Diagnosis of breast cancer (Japanese original diagnostic code: 8849699) recorded between 2014 and 2018 in EMR data.</li> </ul>                                                                                                                           |
| <b><math>\beta</math>. Primary colorectal cancer</b> | $\beta$ 1  | <ul style="list-style-type: none"> <li>Definitive diagnosis of colorectal cancer (ICD-10: C179, C182, C184, C186, C187, C189, C19, or C20) recorded between 2014 and 2018 in DPC data. Primary diagnosis, admission-precipitating diagnosis, or most resource-consuming diagnosis.</li> </ul>   |

| Outcome                                              | Definition   |                                                                                                                                                                                                                                                                                              |
|------------------------------------------------------|--------------|----------------------------------------------------------------------------------------------------------------------------------------------------------------------------------------------------------------------------------------------------------------------------------------------|
|                                                      | $\beta 2$    | <ul style="list-style-type: none"> <li>Definitive diagnosis of colorectal cancer (ICD-10: C179, C182, C184, C186, C187, C189, C19, or C20) recorded between 2014 and 2018 in EMR data.</li> </ul>                                                                                            |
|                                                      | $\beta 3$    | <ul style="list-style-type: none"> <li>Diagnosis of breast cancer (Japanese original diagnostic code: 8847915 or 8847916) recorded between 2014 and 2018 in EMR data.</li> </ul>                                                                                                             |
| <b><math>\gamma</math>. Primary ovarian cancer</b>   | $\gamma 1$   | <ul style="list-style-type: none"> <li>Definitive diagnosis of ovarian cancer (ICD-10: C56, C799, C570, or C482) recorded between 2014 and 2018 in DPC data. Primary diagnosis, admission-precipitating diagnosis, or most resource-consuming diagnosis.</li> </ul>                          |
|                                                      | $\gamma 2$   | <ul style="list-style-type: none"> <li>Definitive diagnosis of ovarian cancer (ICD-10: C56, C799, C570, or C482) recorded between 2014 and 2018 in EMR data.</li> </ul>                                                                                                                      |
| <b><math>\epsilon</math>. Primary bladder cancer</b> | $\epsilon 1$ | <ul style="list-style-type: none"> <li>Definitive diagnosis of bladder cancer (ICD-10: C670, C671, C672, C673, C674, C675, C676, or C679) recorded between 2014 and 2018 in DPC data. Primary diagnosis, admission-precipitating diagnosis, or most resource-consuming diagnosis.</li> </ul> |
|                                                      | $\epsilon 2$ | <ul style="list-style-type: none"> <li>Definitive diagnosis of bladder cancer (ICD-10: C670, C671, C672, C673, C674, C675, C676, or C679) recorded between 2014 and 2018 in EMR data.</li> </ul>                                                                                             |
| <b><math>\delta</math>. Primary prostate cancer</b>  | $\delta 1$   | <ul style="list-style-type: none"> <li>Definitive diagnosis of prostate cancer (ICD-10: C61 or Z988) recorded between 2009 and 2018 in DPC data. Primary diagnosis, admission-precipitating diagnosis, or most resource-consuming diagnosis.</li> </ul>                                      |

| Outcome                                                               | Definition |                                                                                                                                                                                                                                                                                                                                                                                                                                                                                                                                                                                         |
|-----------------------------------------------------------------------|------------|-----------------------------------------------------------------------------------------------------------------------------------------------------------------------------------------------------------------------------------------------------------------------------------------------------------------------------------------------------------------------------------------------------------------------------------------------------------------------------------------------------------------------------------------------------------------------------------------|
|                                                                       | δ2         | <ul style="list-style-type: none"> <li>Definitive diagnosis of prostate cancer (ICD-10: C61 or Z988) recorded between 2009 and 2018 in EMR data.</li> </ul>                                                                                                                                                                                                                                                                                                                                                                                                                             |
| <b>D. Performance status 2 or higher at the start of chemotherapy</b> | D1         | Medical treatment of rehabilitation for cancer patients (Japanese original diagnostic code: 180033110) recorded between 2014 and 2018 in claims data, given in the same index month as the prescription month of the therapeutic drug described in Table S3.                                                                                                                                                                                                                                                                                                                            |
|                                                                       | D2         | <ul style="list-style-type: none"> <li>Medical treatment of rehabilitation for disuse syndrome (Japanese original diagnostic code: H001-02, 180044610, 180044710, 180044810, 180044910, 180045010, 180045110, 180045210, 180045310, 180045410, 180045530, 180045630, 180045730, 180051530, 180051630, 180051730, 180051830, 180051930, 180052030, 180052130, 180052230, 180052330, 180052430, 180052530, or 180052630) recorded between 2014 and 2018 in claims data, given in the same index month as the prescription month of the therapeutic drug described in Table S3.</li> </ul> |
| <b>E. Death</b>                                                       | E1         | <ul style="list-style-type: none"> <li>Date of death in EMR data.</li> </ul>                                                                                                                                                                                                                                                                                                                                                                                                                                                                                                            |
|                                                                       | E2         | <ul style="list-style-type: none"> <li>Date of death in DPC data.</li> </ul>                                                                                                                                                                                                                                                                                                                                                                                                                                                                                                            |
|                                                                       | E3         | <ul style="list-style-type: none"> <li>Medical treatment of death for patients (Japanese original diagnostic code: 114007270, 114018670, or 114019970) recorded between 2014 and 2018 in claims data.</li> </ul>                                                                                                                                                                                                                                                                                                                                                                        |
|                                                                       | E4         | <ul style="list-style-type: none"> <li>30 days before and after definitions written in E1.</li> </ul>                                                                                                                                                                                                                                                                                                                                                                                                                                                                                   |

| Outcome                                 | Definition |                                                                                                                                                                                                                                                                                                                                                                   |
|-----------------------------------------|------------|-------------------------------------------------------------------------------------------------------------------------------------------------------------------------------------------------------------------------------------------------------------------------------------------------------------------------------------------------------------------|
|                                         | E5         | <ul style="list-style-type: none"> <li>30 days before and after definitions written in E2.</li> </ul>                                                                                                                                                                                                                                                             |
|                                         | E6         | <ul style="list-style-type: none"> <li>30 days before and after definitions written in E3.</li> </ul>                                                                                                                                                                                                                                                             |
| <b>F. First recurrence/progression</b>  | F1         | <ul style="list-style-type: none"> <li>Date of disease name with "recurrence" as a modifier in Japanese original diagnostic code.</li> </ul>                                                                                                                                                                                                                      |
|                                         | F2         | <ul style="list-style-type: none"> <li>Second specimen examination for laboratory diagnosis (Japanese original procedural code: 160060170, 160060270, 160171470, 160185110, 160214310, 160209750, 160214710, 160214810, 160190270, 160190370, 160190470, 160190570, 160214470, 160214970, or 160062310) recorded between 2014 and 2018 in claims data.</li> </ul> |
|                                         | F3         | <ul style="list-style-type: none"> <li>Definitions written in F2 and patients with no history of surgery for the purpose of excision (with or without surgery for the purpose of examination).</li> </ul>                                                                                                                                                         |
|                                         | F4         | <ul style="list-style-type: none"> <li>Month of definitions written in F1.</li> </ul>                                                                                                                                                                                                                                                                             |
|                                         | F5         | <ul style="list-style-type: none"> <li>Month of definitions written in F2.</li> </ul>                                                                                                                                                                                                                                                                             |
|                                         | F6         | <ul style="list-style-type: none"> <li>Month of definitions written in F3.</li> </ul>                                                                                                                                                                                                                                                                             |
| <b>G. Second recurrence/progression</b> | G1         | <ul style="list-style-type: none"> <li>Date of administration of the drug described in Appendix 2 after definitions written in F1.</li> </ul>                                                                                                                                                                                                                     |
|                                         | G2         | <ul style="list-style-type: none"> <li>Third specimen examination for laboratory diagnosis (Japanese original procedural code: 160060170, 160060270, 160171470, 160185110, 160214310, 160209750, 160214710, 160214810, 160190270, 160190370, 160190470, 160190570, 160214470, 160214970, or 160062310) recorded between 2014 and</li> </ul>                       |

| Outcome                                | Definition |                                                                                                                                                                                                                                                                                                                  |
|----------------------------------------|------------|------------------------------------------------------------------------------------------------------------------------------------------------------------------------------------------------------------------------------------------------------------------------------------------------------------------|
|                                        |            | 2018 in claims data.                                                                                                                                                                                                                                                                                             |
|                                        | G3         | • Month of definitions written in G1.                                                                                                                                                                                                                                                                            |
|                                        | G4         | • Month of definitions written in G2.                                                                                                                                                                                                                                                                            |
| <b>H. Third recurrence/progression</b> | H1         | • Date of administration of the drug described in Appendix 2 after G1.                                                                                                                                                                                                                                           |
|                                        | H2         | • Forth specimen examination for laboratory diagnosis (Japanese original procedural code: 160060170, 160060270, 160171470, 160185110, 160214310, 160209750, 160214710, 160214810, 160190270, 160190370, 160190470, 160190570, 160214470, 160214970, or 160062310) recorded between 2014 and 2018 in claims data. |
|                                        | H3         | • Month of definitions written in H1.                                                                                                                                                                                                                                                                            |
|                                        | H4         | • Month of definitions written in H2.                                                                                                                                                                                                                                                                            |
| <b>Adverse events</b>                  |            |                                                                                                                                                                                                                                                                                                                  |
| <b>I. Interstitial pneumonia</b>       | I1         | • Definitive diagnosis of interstitial pneumonia (ICD-10: J702, J703, J704, J841 or J849) recorded in EMR data and Medical treatment (ATC code: H02AB04 or H02AB06 [excludes topical drugs]).                                                                                                                    |
|                                        | I2         | • Definitive diagnosis of interstitial pneumonia (ICD-10: J448, J700, J701, J702, J704, J82, J841, J849, or M0510) recorded in EMR data.                                                                                                                                                                         |
|                                        | I3         | • Definitions written in I2 plus prescription of methylprednisolone (ATC code: H02AB04) or prednisolone                                                                                                                                                                                                          |

| Outcome                      | Definition |                                                                                                                                                                                                                                                                                                                                                    |
|------------------------------|------------|----------------------------------------------------------------------------------------------------------------------------------------------------------------------------------------------------------------------------------------------------------------------------------------------------------------------------------------------------|
|                              |            | (ATC code: H02AB06 with exception of external medicine) recorded in claims data.                                                                                                                                                                                                                                                                   |
| <b>J. Hepatic failure</b>    | J1         | <ul style="list-style-type: none"> <li>Definitive diagnosis of hepatic failure (ICD-10: K720, K712, or K713) recorded in EMR data plus prescription of methylprednisolone (ATC code: H02AB04) or prednisolone (ATC code: H02AB06 with exception of external medicine) recorded in claims data.</li> </ul>                                          |
|                              | J2         | <ul style="list-style-type: none"> <li>Laboratory data abnormality in EMR data plus prescription of methylprednisolone (ATC code: H02AB04) or prednisolone (ATC code: H02AB06 with exception of external medicine) recorded in claims data.</li> </ul>                                                                                             |
|                              | J3         | <ul style="list-style-type: none"> <li>Definitive diagnosis of hepatic failure (ICD-10: K710, K711, K712, K716, K717, K718, K719, K720, K729, K739, K740, K741, K743, K744, K745, K746, K750, K751, K752, K753, K754, K758, K759, K760, K761, K762, K763, K764, K765, K767, K768, K769, R18, R609, R945, or S361) recorded in EMR data.</li> </ul> |
|                              | J4         | <ul style="list-style-type: none"> <li>Definitions written in J3 plus prescription of medical treatment (ATC code: H02AB04, H02AB06, A05AA02, or A05BA08) recorded in claims data.</li> </ul>                                                                                                                                                      |
| <b>K. Colitis • diarrhea</b> | K1         | <ul style="list-style-type: none"> <li>Definitive diagnosis of colitis • diarrhea (ICD-10: A090 or A099) recorded in EMR data plus prescription of methylprednisolone (ATC code: H02AB04) or prednisolone (ATC code: H02AB06 with exception of external medicine) recorded in claims data.</li> </ul>                                              |

| Outcome                             | Definition |                                                                                                                                                                                                                                                                                                                           |
|-------------------------------------|------------|---------------------------------------------------------------------------------------------------------------------------------------------------------------------------------------------------------------------------------------------------------------------------------------------------------------------------|
|                                     | K2         | <ul style="list-style-type: none"> <li>Definitive diagnosis of colitis • diarrhea (ICD-10: A099, K501, K509, K510, K512, K513, K515, K518, K519, K521, K522, K528, K529, K550, K551, K552, K559, K566, K591, K628, K638, K921, K922, M321, or R101) recorded in EMR data.</li> </ul>                                      |
|                                     | K3         | <ul style="list-style-type: none"> <li>Definitions written in K2 plus prescription of medical treatment (ATC codes: H02AB04, H02AB06, A07A, A07F, A07E, A07D, or A07X) recorded in claims data.</li> </ul>                                                                                                                |
| <b>L. Type 1 diabetes</b>           | L1         | <ul style="list-style-type: none"> <li>Prescription of medical treatment (ATC code: A10AB, A10AC, A10AD, or A10AE)</li> </ul>                                                                                                                                                                                             |
|                                     | L2         | <ul style="list-style-type: none"> <li>Definitive diagnosis of type 1 diabetes (ICD-10: E10, E100, E101, E102, E103, E104, E105, or E106) recorded in EMR data.</li> </ul>                                                                                                                                                |
| <b>M. Encephalitis • meningitis</b> | M1         | <ul style="list-style-type: none"> <li>Definitive diagnosis of encephalitis • meningitis (ICD-10: G040, G048, G049, or G934) recorded in EMR data.</li> </ul>                                                                                                                                                             |
|                                     | M2         | <ul style="list-style-type: none"> <li>Definitive diagnosis of encephalitis • meningitis (ICD-10: G040, G048, G049, or G934) recorded in EMR data plus prescription of methylprednisolone (ATC code: H02AB04) or prednisolone (ATC code: H02AB06 with exception of external medicine) recorded in claims data.</li> </ul> |
|                                     | M3         | <ul style="list-style-type: none"> <li>Definitive diagnosis of encephalitis.</li> <li>Meningitis (ICD-10: R291) recorded in EMR data.</li> </ul>                                                                                                                                                                          |
|                                     | M4         | <ul style="list-style-type: none"> <li>Definitions written in M3 plus prescription Meningitis (ICD-10: R291) recorded in EMR data of medical</li> </ul>                                                                                                                                                                   |

| Outcome                                         | Definition |                                                                                                                                                                                                                                                                                                                                                                                                                                                                                                                                                                                                                                                                  |
|-------------------------------------------------|------------|------------------------------------------------------------------------------------------------------------------------------------------------------------------------------------------------------------------------------------------------------------------------------------------------------------------------------------------------------------------------------------------------------------------------------------------------------------------------------------------------------------------------------------------------------------------------------------------------------------------------------------------------------------------|
|                                                 |            | treatment (ATC code: J05AB, J01, or J02A) recorded in claims data.                                                                                                                                                                                                                                                                                                                                                                                                                                                                                                                                                                                               |
| <b>N. Nerve disorder (excludes paresthesia)</b> | N1         | <ul style="list-style-type: none"> <li>Definitive diagnosis of nerve disorder (excludes paresthesia) (ICD-10: G500, G501, G508, G509, G511, G512, G513, G514, G518, G519, G520, G521, G522, G523, G527, G528, G529, G540, G541, G542, G543, G544, G545, G560, G561, G562, G563, G564, G568, G569, G570, G571, G572, G573, G574, G575, G576, G579, G580, G587, G588, G589, G603, G608, G609, G618, G620, G622, G629, G64, G723, G810, G811, G819, G820, G821, G822, G823, G824, G825, G830, G831, G832, G833, G839, G900, G902, G903, G904, G908, G909, H812, H919, H933, M7924, M7926, M7929, M8900, M998, R252, R253, or R258) recorded in EMR data.</li> </ul> |
|                                                 | N2         | <ul style="list-style-type: none"> <li>Definitions written in N1 and medical treatment (ATC code H02AB04 or H02AB06) recorded in claims data.</li> </ul>                                                                                                                                                                                                                                                                                                                                                                                                                                                                                                         |
| <b>O. Myasthenia gravis</b>                     | O1         | <ul style="list-style-type: none"> <li>Definitive diagnosis of myasthenia gravis (ICD-10: G700) recorded in EMR data.</li> </ul>                                                                                                                                                                                                                                                                                                                                                                                                                                                                                                                                 |
|                                                 | O2         | <ul style="list-style-type: none"> <li>Definitive diagnosis of myasthenia gravis (ICD-10: G700) recorded in EMR data plus prescription of methylprednisolone (ATC code: H02AB04) or prednisolone (ATC code: H02AB06 with exception of external medicine) recorded in claims data.</li> </ul>                                                                                                                                                                                                                                                                                                                                                                     |
|                                                 | O3         | <ul style="list-style-type: none"> <li>Definitive diagnosis of myasthenia gravis (ICD-10: G700, G701, G709) recorded in EMR data.</li> </ul>                                                                                                                                                                                                                                                                                                                                                                                                                                                                                                                     |
|                                                 | O4         | <ul style="list-style-type: none"> <li>Definitions written in O3 and medical treatment (ATC code: H02AB04, H02AB06, or H07AA02)</li> </ul>                                                                                                                                                                                                                                                                                                                                                                                                                                                                                                                       |

| Outcome                           | Definition |                                                                                                                                                                                                                                                                                                                                                                                                                                                                                                                                                                                                                                                                                                                                                                                                                                                     |
|-----------------------------------|------------|-----------------------------------------------------------------------------------------------------------------------------------------------------------------------------------------------------------------------------------------------------------------------------------------------------------------------------------------------------------------------------------------------------------------------------------------------------------------------------------------------------------------------------------------------------------------------------------------------------------------------------------------------------------------------------------------------------------------------------------------------------------------------------------------------------------------------------------------------------|
|                                   |            | recorded in claims data.                                                                                                                                                                                                                                                                                                                                                                                                                                                                                                                                                                                                                                                                                                                                                                                                                            |
| <b>P. Guillain-Barré syndrome</b> | P1         | <ul style="list-style-type: none"> <li>Definitive diagnosis of Guillain-Barré syndrome (ICD-10: G610) recorded in EMR data.</li> </ul>                                                                                                                                                                                                                                                                                                                                                                                                                                                                                                                                                                                                                                                                                                              |
|                                   | P2         | <ul style="list-style-type: none"> <li>Definitions written in P1 plus prescription of methylprednisolone (ATC code: H02AB04) or prednisolone (ATC code: H02AB06 with exception of external medicine) recorded in claims data.</li> </ul>                                                                                                                                                                                                                                                                                                                                                                                                                                                                                                                                                                                                            |
|                                   | P3         | <ul style="list-style-type: none"> <li>Definitions written in P1 plus prescription of methylprednisolone (ATC code: H02AB04), prednisolone (ATC code: H02AB06 with exception of external medicine), or immunoglobulin recorded in claims data.</li> </ul>                                                                                                                                                                                                                                                                                                                                                                                                                                                                                                                                                                                           |
|                                   | P4         | <ul style="list-style-type: none"> <li>Definitions written in P1 and medical treatment (ATC code: H02AB04, H02AB06, J06BA, J06BB, or J06BC) recorded in claims data.</li> </ul>                                                                                                                                                                                                                                                                                                                                                                                                                                                                                                                                                                                                                                                                     |
| <b>Q. Skin disorders</b>          | Q1         | <ul style="list-style-type: none"> <li>Definitive diagnosis of skin disorders (ICD-10: H605, H738, I831, L00, L010, L011, L020, L021, L022, L023, L024, L028, L029, L030, L031, L032, L033, L038, L039, L080, L081, L089, L100, L101, L102, L103, L104, L105, L108, L109, L110, L111, L119, L120, L121, L123, L129, L130, L131, L138, L139, L200, L208, L210, L219, L233, L238, L239, L26, L270, L271, L279, L280, L281, L282, L290, L291, L292, L298, L299, L300, L301, L302, L303, L304, L305, L309, L400, L401, L402, L403, L404, L408, L409, L410, L411, L413, L414, L415, L418, L419, L42, L430, L431, L433, L438, L439, L440, L441, L442, L443, L449, L500, L501, L502, L504, L508, L509, L510, L511, L512, L518, L519, L52, L530, L531, L532, L538, L539, L560, L561, L562, L563, L564, L568, L570, L571, L572, L574, L578, L580,</li> </ul> |

| Outcome                  | Definition |                                                                                                                                                                                                                                                                                                                                                                                                                                                                                                             |
|--------------------------|------------|-------------------------------------------------------------------------------------------------------------------------------------------------------------------------------------------------------------------------------------------------------------------------------------------------------------------------------------------------------------------------------------------------------------------------------------------------------------------------------------------------------------|
|                          |            | L589, L590, L598, L700, L701, L702, L703, L708, L709, L710, L711, L718, L719, L730, L731, L738, L739, L80, L810, L811, L812, L813, L814, L816, L817, L818, L819, L82, L83, L850, L851, L852, L853, L858, L859, L870, L871, L872, L879, L88, L890, L891, L892, L893, L899, L900, L906, L908, L909, L919, L920, L921, L928, L929, L930, L931, L932, L940, L941, L942, L943, L944, L945, L946, L950, L951, L97, L980, L981, L982, L983, L984, L985, L986, L988, R02, R21, R238, or T783) recorded in EMR data. |
|                          | Q2         | <ul style="list-style-type: none"> <li>Definitions written in Q1 and medical treatment (ATC codes: H02AB04, H02AB06, D04AA, or R01AC [excludes steroidal drugs]) recorded in claims data.</li> </ul>                                                                                                                                                                                                                                                                                                        |
| <b>R. Rhabdomyolysis</b> | R1         | <ul style="list-style-type: none"> <li>“Drug-induced rhabdomyolysis” or “rhabdomyolysis” in definitive diagnosis of rhabdomyolysis (ICD-10: M6289) recorded in EMR data.</li> </ul>                                                                                                                                                                                                                                                                                                                         |
|                          | R2         | <ul style="list-style-type: none"> <li>Definitive diagnosis of rhabdomyolysis (ICD-10: D868, G718, G720, G722, G724, G729, M331, M332, M339, M353, M358, M6019, M6091, M6092, M6095, M6098, M6099, M6105, M6109, M6119, M6129, M6155, M6159, M6289, M7900, M7910, M7911, M7912, M7913, M7915, M7916, M7918, M7919, or M7979) recorded in EMR data.</li> </ul>                                                                                                                                               |
|                          | R3         | <ul style="list-style-type: none"> <li>Definitions written in R2 plus prescription of methylprednisolone (ATC code: H02AB04) or prednisolone (ATC code: H02AB06 with exception of external medicine) recorded in claims data.</li> </ul>                                                                                                                                                                                                                                                                    |

| Outcome               | Definition |                                                                                                                                                                                                                                                                                                                                                                                                                                                                                                                                                                                                                                                                                                                                                                                                                                                                                                                                                                                                                                                                              |
|-----------------------|------------|------------------------------------------------------------------------------------------------------------------------------------------------------------------------------------------------------------------------------------------------------------------------------------------------------------------------------------------------------------------------------------------------------------------------------------------------------------------------------------------------------------------------------------------------------------------------------------------------------------------------------------------------------------------------------------------------------------------------------------------------------------------------------------------------------------------------------------------------------------------------------------------------------------------------------------------------------------------------------------------------------------------------------------------------------------------------------|
| <b>S. Myocarditis</b> | S1         | <ul style="list-style-type: none"> <li>Definitive diagnosis of myocarditis (ICD-10: I401, I408, I409, I514) recorded in EMR data.</li> </ul>                                                                                                                                                                                                                                                                                                                                                                                                                                                                                                                                                                                                                                                                                                                                                                                                                                                                                                                                 |
|                       | S2         | <ul style="list-style-type: none"> <li>Definitive diagnosis of myocarditis (ICD-10: I401, I408, I409, I514) recorded in EMR data plus prescription of methylprednisolone (ATC code: H02AB04) or prednisolone (ATC code: H02AB06 with exception of external medicine) recorded in claims data.</li> </ul>                                                                                                                                                                                                                                                                                                                                                                                                                                                                                                                                                                                                                                                                                                                                                                     |
|                       | S3         | <ul style="list-style-type: none"> <li>Definitive diagnosis of myocarditis (ICD-10: D868, E854, E888, E889, I010, I011, I012, I018, I019, I050, I051, I052, I058, I059, I060, I061, I062, I069, I070, I071, I072, I078, I079, I080, I081, I082, I083, I088, I089, I090, I091, I092, I099, I200, I201, I208, I209, I210, I211, I212, I213, I214, I219, I220, I221, I228, I229, I230, I231, I232, I233, I234, I235, I236, I238, I240, I241, I248, I249, I251, I252, I253, I254, I255, I256, I258, I259, I300, I308, I309, I319, I339, I340, I341, I342, I348, I350, I351, I352, I358, I359, I360, I361, I362, I369, I370, I371, I372, I379, I38, I401, I408, I409, I420, I421, I422, I423, I424, I425, I426, I427, I428, I429, I440, I441, I442, I443, I444, I445, I446, I447, I451, I452, I453, I454, I455, I456, I458, I459, I460, I461, I469, I470, I471, I472, I479, I480, I481, I482, I489, I490, I491, I492, I493, I494, I495, I498, I499, I500, I501, I509, I513, I514, I515, I518, I519, R000, R001, R008, R570, R571, R579, or R943) recorded in EMR data.</li> </ul> |
|                       | S4         | <ul style="list-style-type: none"> <li>Definitions written in S3 plus prescription of methylprednisolone (ATC code: H02AB04) or prednisolone (ATC code: H02AB06 with exception of external medicine) recorded in claims data.</li> </ul>                                                                                                                                                                                                                                                                                                                                                                                                                                                                                                                                                                                                                                                                                                                                                                                                                                     |

| Outcome                                | Definition |                                                                                                                                                                                                                                                                                                       |
|----------------------------------------|------------|-------------------------------------------------------------------------------------------------------------------------------------------------------------------------------------------------------------------------------------------------------------------------------------------------------|
| <b>T. Gastrointestinal perforation</b> | T1         | <ul style="list-style-type: none"> <li>Definitive diagnosis of gastrointestinal perforation (ICD-10: K255, K265, K631, K65S, or K639) recorded in EMR data.</li> </ul>                                                                                                                                |
| <b>U. Adrenal insufficiency</b>        | U1         | <ul style="list-style-type: none"> <li>Definitive diagnosis of adrenal insufficiency in Japanese original diagnostic code including the words “autoimmune adrenitis” recorded in claims data and “hypoadrenocorticism” plus medical treatment (ATC: code H02AB09) recorded in claims data.</li> </ul> |
|                                        | U2         | <ul style="list-style-type: none"> <li>Definitive diagnosis of adrenal insufficiency (ICD-10: E271, E272, E273, E274, E275 or E278) recorded in EMR data.</li> </ul>                                                                                                                                  |
|                                        | U3         | <ul style="list-style-type: none"> <li>Definitions written in U2 plus medical treatment (ATC code H02AB09) recorded in claims data.</li> </ul>                                                                                                                                                        |
| <b>X. Febrile neutropenia</b>          | X1         | <ul style="list-style-type: none"> <li>Definitive diagnosis of febrile neutropenia (ICD-10: D70) recorded in EMR data and medical treatment (Table S3) recorded in claims data.</li> </ul>                                                                                                            |

ATC, Anatomical Therapeutic Chemical; DPC, Diagnosis Procedure Combination; EMR, electronic medical record; ICD-10, ICD-10, International Classification of Diseases, 10th revision

**Table S3.** Drug codes

| <b>ATC code</b>  | <b>Common name</b>                                                                                                                                                          |
|------------------|-----------------------------------------------------------------------------------------------------------------------------------------------------------------------------|
| L01XC32          | Atezolizumab                                                                                                                                                                |
| L01XC17          | Nivolumab                                                                                                                                                                   |
| L01XC18          | Pembrolizumab                                                                                                                                                               |
| L01XC31          | Avelumab                                                                                                                                                                    |
| L01XC28          | Durvalumab                                                                                                                                                                  |
| L01XC06          | Cetuximab                                                                                                                                                                   |
| L01XC08          | Panitumumab                                                                                                                                                                 |
| L01XE02          | Gefitinib                                                                                                                                                                   |
| L01XE35          | Osimertinib                                                                                                                                                                 |
| L01XE47          | Dacomitinib                                                                                                                                                                 |
| L01XE13          | Afatinib                                                                                                                                                                    |
| L01XE03          | Erlotinib                                                                                                                                                                   |
| L01XE36          | Alectinib                                                                                                                                                                   |
| L01XE44          | Lorlatinib                                                                                                                                                                  |
| L01XE28          | Ceritinib                                                                                                                                                                   |
| L01XE16          | Crizotinib                                                                                                                                                                  |
| L01XC07          | Bevacizumab (includes related biosimilars)                                                                                                                                  |
| L01XC13          | Pertuzumab                                                                                                                                                                  |
| L01XC14          | Trastuzumab emtansine                                                                                                                                                       |
| L01XE07          | Lapatinib                                                                                                                                                                   |
| L01XE33          | Palbociclib                                                                                                                                                                 |
| L01XE50          | Abemaciclib                                                                                                                                                                 |
| L01XE10, L04AA18 | Everolimus                                                                                                                                                                  |
| L01XX46          | Olaparib                                                                                                                                                                    |
| L01XC08          | Panitumumab                                                                                                                                                                 |
| L01XE21          | Regorafenib                                                                                                                                                                 |
| L01              | Anti-malignant tumor drugs excluding talaporfin sodium (620001918), porfimer sodium (620007468), anagrelide hydrochloride hydrate (622379001), and sterile talc (622293901) |
| L02              | Hormone therapy                                                                                                                                                             |

| <b>ATC code</b> | <b>Common name</b>                  |
|-----------------|-------------------------------------|
| L04             | Immunosuppressive drug              |
| J01CR05         | Tazobactam and piperacillin         |
| J01DD02         | Ceftazidime hydrate                 |
| J01DE03         | Cefozopran hydrochloride            |
| J01DE01         | Cefepime dihydrochloride hydrate    |
| J01DE02         | Cefpirome sulfate                   |
| J01DH05         | Biapenem                            |
| J01DH02         | Meropenem hydrate                   |
| J01DH51         | Imipenem hydrate, cilastatin sodium |
| J01DH04         | Doripenem hydrate                   |
| J01DH55         | Panipenem and betamipron            |

**Table S4.** Accuracy of diagnosis definitions

| <b>Outcome definition</b>  | <b>True positives, n</b> | <b>False positives, n</b> | <b>True negatives, n</b> | <b>False negatives, n</b> | <b>Sensitivity, % (95% CI)</b> | <b>Specificity, % (95% CI)</b> | <b>PPV, % (95% CI)</b> | <b>NPV, % (95% CI)</b> |
|----------------------------|--------------------------|---------------------------|--------------------------|---------------------------|--------------------------------|--------------------------------|------------------------|------------------------|
| <b>Lung cancer</b>         |                          |                           |                          |                           |                                |                                |                        |                        |
| Primary lung cancer        |                          |                           |                          |                           |                                |                                |                        |                        |
| A1                         | 132                      | 7                         | 22,237                   | 30                        | 81.5<br>(74.6–87.1)            | 100.0<br>(99.9–100.0)          | 95.0<br>(89.9–98.0)    | 99.9<br>(99.8–99.9)    |
| A2                         | 162                      | 38                        | 22,206                   | 0                         | 100.0<br>(96.6–100.0)          | 99.8<br>(99.8–99.9)            | 81.0<br>(74.9–86.2)    | 100.0<br>(100.0–100.0) |
| A3                         | 19                       | 1                         | 22,243                   | 143                       | 11.7<br>(7.2–17.7)             | 100.0<br>(100.0–100.0)         | 95.0<br>(75.1–99.9)    | 99.4<br>(99.2–99.5)    |
| A4                         | 128                      | 7                         | 22, 237                  | 34                        | 79.0<br>(71.8–85.0)            | 100.0<br>(99.9–100)            | 94.8<br>(89.6–97.9)    | 99.8<br>(99.8–99.9)    |
| Non-small cell lung cancer |                          |                           |                          |                           |                                |                                |                        |                        |
| B1                         | 46                       | 6                         | 22,280                   | 74                        | 38.3<br>(29.6–47.6)            | 100.0<br>(99.9–100.0)          | 88.5<br>(76.6–95.6)    | 99.7<br>(99.6–99.7)    |
| B2                         | 46                       | 6                         | 22,280                   | 74                        | 38.3<br>(29.6–47.6)            | 100.0<br>(99.9–100.0)          | 88.5<br>(76.6–95.6)    | 99.7<br>(99.6–99.7)    |
| Small cell lung cancer     |                          |                           |                          |                           |                                |                                |                        |                        |
| C1                         | 10                       | 0                         | 22,395                   | 1                         | 90.9<br>(58.7–99.8)            | 100.0<br>(100.0–100.0)         | 100.0<br>(58.7–100.0)  | 100.0<br>(100.0–100.0) |
| <b>Breast cancer</b>       |                          |                           |                          |                           |                                |                                |                        |                        |
| Primary breast cancer      |                          |                           |                          |                           |                                |                                |                        |                        |
| $\alpha$ 1                 | 93                       | 18                        | 45,036                   | 55                        | 62.8<br>(54.5–70.6)            | 100.0<br>(99.9–100.0)          | 83.8<br>(75.6–90.1)    | 99.9<br>(99.8–99.9)    |
| $\alpha$ 2                 | 148                      | 52                        | 45,002                   | 0                         | 100.0<br>(96.3–100.0)          | 99.9<br>(99.8–99.9)            | 74.0<br>(67.3–79.9)    | 100.0<br>(100.0–100.0) |
| $\alpha$ 3                 | 0                        | 0                         | 45,054                   | 148                       | 0.0<br>(0.0–3.7)               | 100.0<br>(100.0–100.0)         | NA                     | 99.7<br>(99.6–99.7)    |
| <b>Colorectal cancer</b>   |                          |                           |                          |                           |                                |                                |                        |                        |
| Primary colorectal cancer  |                          |                           |                          |                           |                                |                                |                        |                        |

| Outcome definition      | True positives, n | False positives, n | True negatives, n | False negatives, n | Sensitivity, % (95% CI) | Specificity, % (95% CI) | PPV, % (95% CI)       | NPV, % (95% CI)        |
|-------------------------|-------------------|--------------------|-------------------|--------------------|-------------------------|-------------------------|-----------------------|------------------------|
| $\beta_1$               | 108               | 8                  | 28,340            | 53                 | 67.1<br>(59.2–74.3)     | 100.0<br>(99.9–100.0)   | 93.1<br>(86.9–97.0)   | 99.8<br>(99.8–99.9)    |
| $\beta_2$               | 161               | 39                 | 28,309            | 0                  | 100.0<br>(96.6–100.0)   | 99.9<br>(99.8–99.9)     | 80.5<br>(74.3–85.8)   | 100.0<br>(100.0–100.0) |
| $\beta_3$               | 0                 | 0                  | 28,348            | 161                | 0.0<br>(0.0–3.4)        | 100.0<br>(100.0–100.0)  | NA                    | 99.4<br>(99.3–99.5)    |
| <b>Ovarian cancer</b>   |                   |                    |                   |                    |                         |                         |                       |                        |
| Primary ovarian cancer  |                   |                    |                   |                    |                         |                         |                       |                        |
| $\gamma_1$              | 44                | 14                 | 11,692            | 5                  | 89.8<br>(77.8–96.6)     | 99.9<br>(99.8–99.9)     | 75.9<br>(62.8–86.1)   | 100.0<br>(99.7–100.0)  |
| $\gamma_2$              | 49                | 50                 | 11,656            | 0                  | 100.0<br>(89.4–100.0)   | 99.6<br>(99.4–99.7)     | 49.5<br>(39.3–59.7)   | 100.0<br>(100.0–100.0) |
| <b>Bladder cancer</b>   |                   |                    |                   |                    |                         |                         |                       |                        |
| Primary bladder cancer  |                   |                    |                   |                    |                         |                         |                       |                        |
| $\epsilon_1$            | 33                | 16                 | 44,206            | 9                  | 78.6<br>(63.2–89.7)     | 100.0<br>(99.9–100.0)   | 67.3<br>(52.5–80.1)   | 100.0<br>(100.0–100.0) |
| $\epsilon_2$            | 42                | 58                 | 44,164            | 0                  | 100.0<br>(87.7–100.0)   | 99.9<br>(99.8–99.9)     | 42.0<br>(32.2–52.3)   | 99.9<br>(99.8–99.9)    |
| <b>Prostate cancer</b>  |                   |                    |                   |                    |                         |                         |                       |                        |
| Primary prostate cancer |                   |                    |                   |                    |                         |                         |                       |                        |
| $\delta_1$              | 17                | 0                  | 11,676            | 62                 | 21.5<br>(12.1–32.2)     | 100.0<br>(100.0–100.0)  | 100.0<br>(72.7–100.0) | 99.5<br>(99.3–99.6)    |
| $\delta_2$              | 79                | 21                 | 11,655            | 0                  | 100.0<br>(93.2–100.0)   | 99.8<br>(99.7–99.9)     | 79.0<br>(69.7–86.5)   | 100.0<br>(100.0–100.0) |

CI, confidence interval; NA, not available; NPV, negative predictive value; PPV, positive predictive value

Table S5. Accuracy of death definitions

| Outcome definition       | True positives, n | False positives, n | True negatives, n | False negatives, n | Sensitivity, % (95% CI) | Specificity, % (95% CI) | PPV, % (95% CI)       | NPV, % (95% CI)       |
|--------------------------|-------------------|--------------------|-------------------|--------------------|-------------------------|-------------------------|-----------------------|-----------------------|
| <b>Lung cancer</b>       |                   |                    |                   |                    |                         |                         |                       |                       |
| E1                       | 32                | 0                  | 40                | 1                  | 97.0<br>(84.2–99.9)     | 100.0<br>(87.1–100.0)   | 100.0<br>(84.2–100.0) | 97.6<br>(87.1–99.9)   |
| E2                       | 9                 | 0                  | 40                | 24                 | 27.3<br>(13.3–45.5)     | 100.0<br>(87.1–100.0)   | 100.0<br>(55.5–100.0) | 62.5<br>(49.5–74.3)   |
| E3                       | 0                 | 0                  | 40                | 33                 | 0.0<br>(0.0–15.3)       | 100.0<br>(87.1–100.0)   | NA                    | 54.8<br>(4.7–66.5)    |
| E4                       | 32                | 0                  | 40                | 1                  | 97.0<br>(84.2–99.9)     | 100.0<br>(87.1–100.0)   | 100.0<br>(84.2–100.0) | 97.6<br>(87.1–99.9)   |
| E5                       | 9                 | 0                  | 40                | 24                 | 27.3<br>(13.3–45.5)     | 100.0<br>(87.1–100.0)   | 100.0<br>(55.5–100.0) | 62.5<br>(49.5–74.3)   |
| E6                       | 0                 | 0                  | 40                | 33                 | 0.0<br>(0.0–15.3)       | 100.0<br>(87.1–100.0)   | NA                    | 54.8<br>(4.7–66.5)    |
| <b>Breast cancer</b>     |                   |                    |                   |                    |                         |                         |                       |                       |
| E1                       | 1                 | 0                  | 104               | 0                  | 100.0<br>(1.3–100.0)    | 100.0<br>(94.8–100.0)   | 100.0<br>(1.3–100.0)  | 100.0<br>(94.8–100.0) |
| E2                       | 0                 | 0                  | 104               | 1                  | 0.0<br>(0.0–98.7)       | 100.0<br>(94.8–100.0)   | NA                    | 99.0<br>(94.8–100.0)  |
| E3                       | 0                 | 0                  | 104               | 1                  | 0.0<br>(0.0–98.7)       | 100.0<br>(94.8–100.0)   | NA                    | 99.0<br>(94.8–100.0)  |
| E4                       | 1                 | 0                  | 104               | 0                  | 100.0<br>(1.3–100.0)    | 100.0<br>(94.8–100.0)   | 100.0%<br>(1.3–100.0) | 100.0<br>(94.8–100.0) |
| E5                       | 0                 | 0                  | 104               | 1                  | 0.0<br>(0.0–98.7)       | 100.0<br>(94.8–100.0)   | NA                    | 99.0<br>(94.8–100.0)  |
| E6                       | 0                 | 0                  | 104               | 1                  | 0.0<br>(0.0–98.7)       | 100.0<br>(94.8–100.0)   | NA                    | 99.0<br>(94.8–100.0)  |
| <b>Colorectal cancer</b> |                   |                    |                   |                    |                         |                         |                       |                       |
| E1                       | 4                 | 0                  | 53                | 0                  | 100.0<br>(28.4–100.0)   | 100.0<br>(90.1–100.0)   | 100.0<br>(28.4–100.0) | 100.0<br>(90.1–100.0) |
| E2                       | 2                 | 0                  | 53                | 2                  | 50.0<br>(6.8–93.2)      | 100.0<br>(90.1–100.0)   | 100.0<br>(9.4–100.0)  | 96.4<br>(87.5–99.6)   |

| Outcome definition    | True positives, n | False positives, n | True negatives, n | False negatives, n | Sensitivity, % (95% CI) | Specificity, % (95% CI) | PPV, % (95% CI)       | NPV, % (95% CI)       |
|-----------------------|-------------------|--------------------|-------------------|--------------------|-------------------------|-------------------------|-----------------------|-----------------------|
| E3                    | 0                 | 0                  | 53                | 4                  | 0.0<br>(0.0–71.6)       | 100.0<br>(90.1–100.0)   | NA                    | 93.0<br>(83.0–98.1)   |
| E4                    | 4                 | 0                  | 53                | 0                  | 100.0<br>(28.4–100.0)   | 100.0<br>(90.1–100.0)   | 100.0<br>(28.4–100.0) | 100.0<br>(90.1–100.0) |
| E5                    | 2                 | 0                  | 53                | 2                  | 50.0<br>(6.8–93.2)      | 100.0<br>(90.1–100.0)   | 100.0<br>(9.4–100.0)  | 96.4<br>(87.5–99.6)   |
| E6                    | 0                 | 0                  | 53                | 4                  | 0.0<br>(0.0–71.6)       | 100.0<br>(90.1–100.0)   | NA                    | 93.0<br>(83.0–98.1)   |
| <b>Ovarian cancer</b> |                   |                    |                   |                    |                         |                         |                       |                       |
| E1                    | 5                 | 0                  | 16                | 0                  | 100.0<br>(35.9–100.0)   | 100.0<br>(71.3–100.0)   | 100.0<br>(35.9–100.0) | 100.0<br>(71.3–100.0) |
| E2                    | 2                 | 0                  | 16                | 3                  | 40.0<br>(5.3–85.3)      | 100.0<br>(71.3–100.0)   | 100.0<br>(9.4–100.0)  | 84.2<br>(60.4–96.6)   |
| E3                    | 0                 | 0                  | 16                | 5                  | 0.0<br>(0.0–64.1)       | 100.0<br>(71.3–100.0)   | NA                    | 76.2<br>(52.8–91.8)   |
| E4                    | 5                 | 0                  | 16                | 0                  | 100.0<br>(35.9–100.0)   | 100.0<br>(71.3–100.0)   | 100.0<br>(35.9–100.0) | 100.0<br>(71.3–100.0) |
| E5                    | 2                 | 0                  | 16                | 3                  | 40.0<br>(5.3–85.3)      | 100.0<br>(71.3–100.0)   | 100.0<br>(9.4–100.0)  | 84.2<br>(60.4–96.6)   |
| E6                    | 0                 | 0                  | 16                | 5                  | 0.0<br>(0.0–64.1)       | 100.0<br>(71.3–100.0)   | NA                    | 76.2<br>(52.8–91.8)   |
| <b>Bladder cancer</b> |                   |                    |                   |                    |                         |                         |                       |                       |
| E1                    | 2                 | 0                  | 8                 | 0                  | 100.0<br>(9.4–100.0)    | 100.0<br>(51.8–100.0)   | 100.0<br>(9.4–100.0)  | 100.0<br>(51.8–100.0) |
| E2                    | 1                 | 0                  | 8                 | 1                  | 50.0<br>(1.3–98.7)      | 100.0<br>(51.8–100.0)   | 100.0<br>(51.8–100.0) | 100.0<br>(1.3–100.0)  |
| E3                    | 0                 | 0                  | 8                 | 2                  | 0.0<br>(0.0–90.6)       | 100.0<br>(51.8–100.0)   | NA                    | 80.0<br>(44.4–97.5)   |
| E4                    | 2                 | 0                  | 8                 | 0                  | 100.0<br>(9.4–100.0)    | 100.0<br>(51.8–100.0)   | 100.0<br>(9.4–100.0)  | 100.0<br>(51.8–100.0) |
| E5                    | 1                 | 0                  | 8                 | 1                  | 50.0<br>(1.3–98.7)      | 100.0<br>(51.8–100.0)   | 100.0<br>(51.8–100.0) | 100.0<br>(1.3–100.0)  |

| Outcome definition     | True positives, n | False positives, n | True negatives, n | False negatives, n | Sensitivity, % (95% CI) | Specificity, % (95% CI) | PPV, % (95% CI)       | NPV, % (95% CI)     |
|------------------------|-------------------|--------------------|-------------------|--------------------|-------------------------|-------------------------|-----------------------|---------------------|
| E6                     | 0                 | 0                  | 8                 | 2                  | 0.0%<br>(0.0–90.6)      | 100.0<br>(51.8–100.0)   | NA                    | 80.0<br>(44.4–97.5) |
| <b>Prostate cancer</b> |                   |                    |                   |                    |                         |                         |                       |                     |
| E1                     | 3                 | 0                  | 32                | 1                  | 75.0<br>(19.4–99.4)     | 100.0<br>(94.2–100.0)   | 100.0<br>(19.4–100.0) | 97.0<br>(84.2–99.9) |
| E2                     | 0                 | 0                  | 32                | 4                  | 0.0<br>(0.0–71.6)       | 100.0<br>(84.2–100.0)   | NA                    | 88.9<br>(73.9–96.9) |
| E3                     | 0                 | 0                  | 32                | 4                  | 0.0<br>(0.0–71.6)       | 100.0<br>(84.2–100.0)   | NA                    | 88.9<br>(73.9–96.9) |
| E4                     | 3                 | 0                  | 32                | 1                  | 75.0<br>(19.4–99.4)     | 100.0<br>(94.2–100.0)   | 100.0<br>(19.4–100.0) | 97.0<br>(84.2–99.9) |
| E5                     | 0                 | 0                  | 32                | 4                  | 0.0<br>(0.0–71.6)       | 100.0<br>(84.2–100.0)   | NA                    | 88.9<br>(73.9–96.9) |
| E6                     | 0                 | 0                  | 32                | 4                  | 0.0<br>(0.0–71.6)       | 100.0<br>(84.2–100.0)   | NA                    | 88.9<br>(73.9–96.9) |

CI, confidence interval; NA, not available; NPV, negative predictive value; PPV, positive predictive value
