# Supplementary figures and images for: Accuracy of algorithms to identify patients with a diagnosis of major cancers and cancer-related adverse events in an administrative database: a validation study in an acute care hospital in Japan
Source: HighWire-hosted journal article supplement (doi:10.1136/bmjopen-2021-055459), 2022-07-01

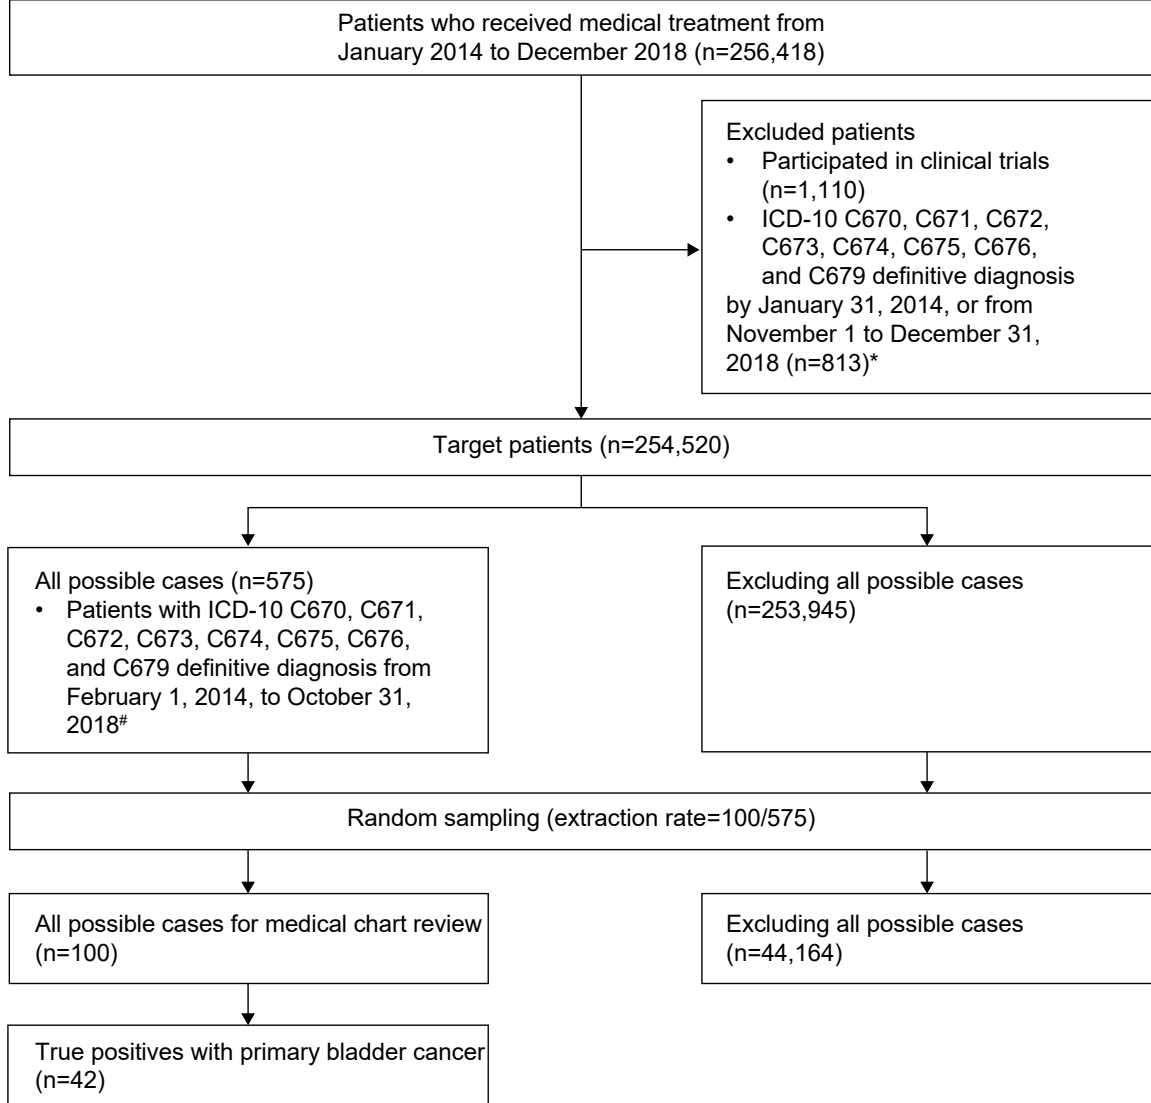

Supplement: bmjopen-2021-055459supp005_data_supplement.pdf [file bmjopen-2021-055459supp005_data_supplement.pdf]

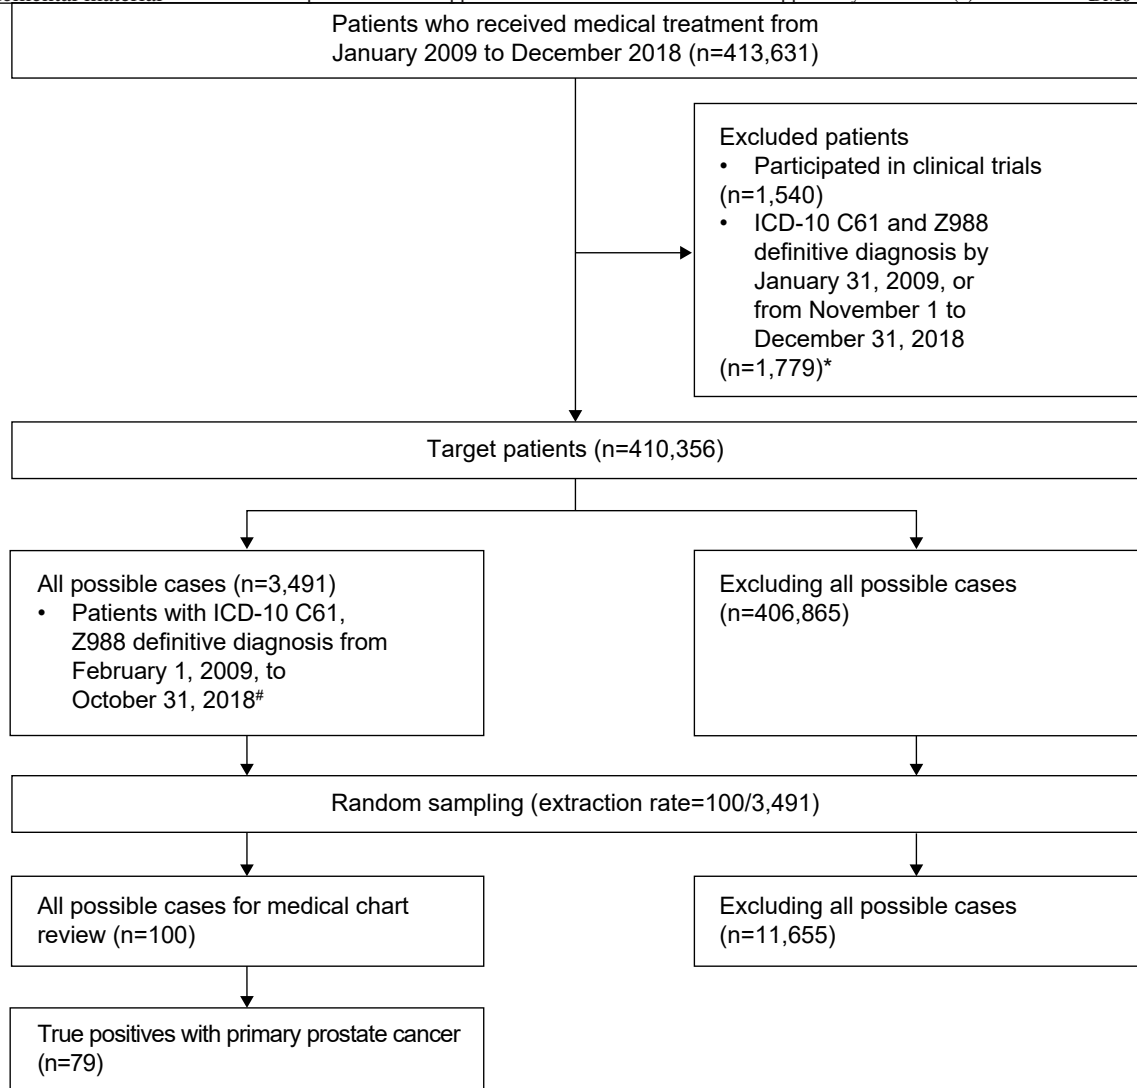

Supplement: bmjopen-2021-055459supp006_data_supplement.pdf [file bmjopen-2021-055459supp006_data_supplement.pdf]
